# Supplementary material
Source: PubMed Central journal article supplement (PMC4985237)

*Raw  
ECoG*

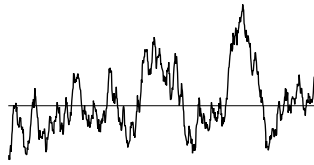

common average reference  
70–110 Hz bandpass

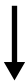

*Filtered  
ECoG*

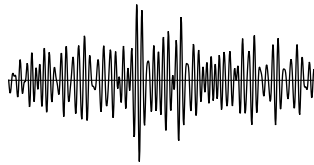

trial alignment  
multi-taper spectral estimation  
baseline normalization

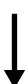

*Event-related  
HG activity*

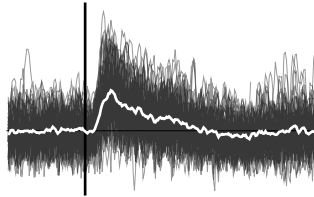

feature selection  
tvDBN interaction estimation  
baseline normalization

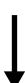

*Event-related  
interaction*

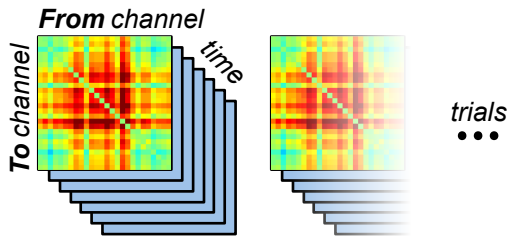

PCA  
sign separation

*spatial*

*temporal*

*Signed PC  
loadings*

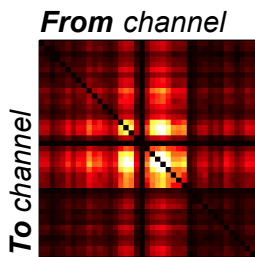

loading statistics

*Signed PC  
scores*

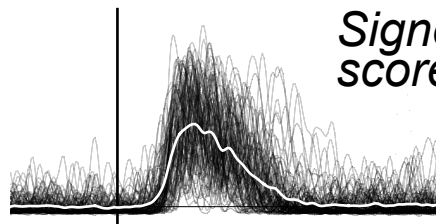

modulation statistics

**FNC  
loadings**

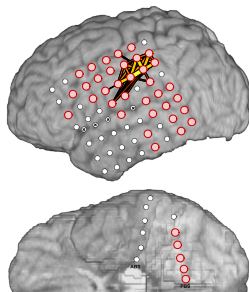

**FNC  
activation**

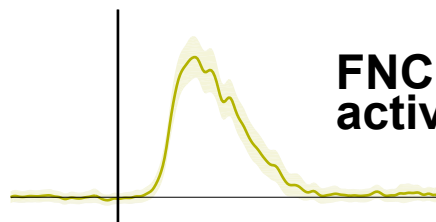

Supplement: NIHMS785704-supplement-1.pdf [file NIHMS785704-supplement-1.pdf]
