# Supplementary material
Source: PubMed Central journal article supplement (PMC4985237)

# Picture Naming FNCs

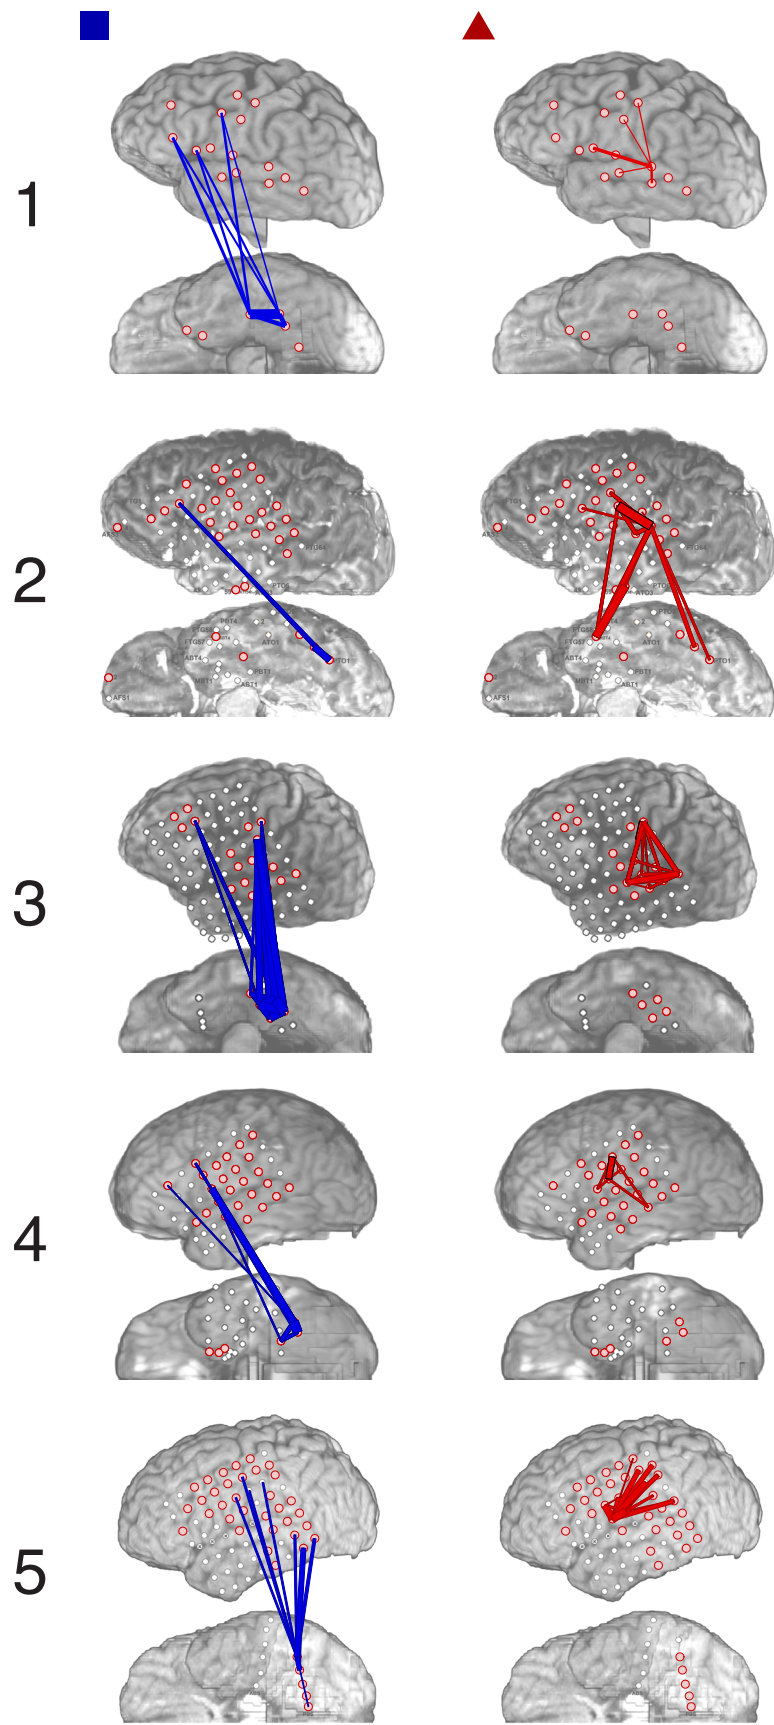

# Auditory Word Repetition FNCs

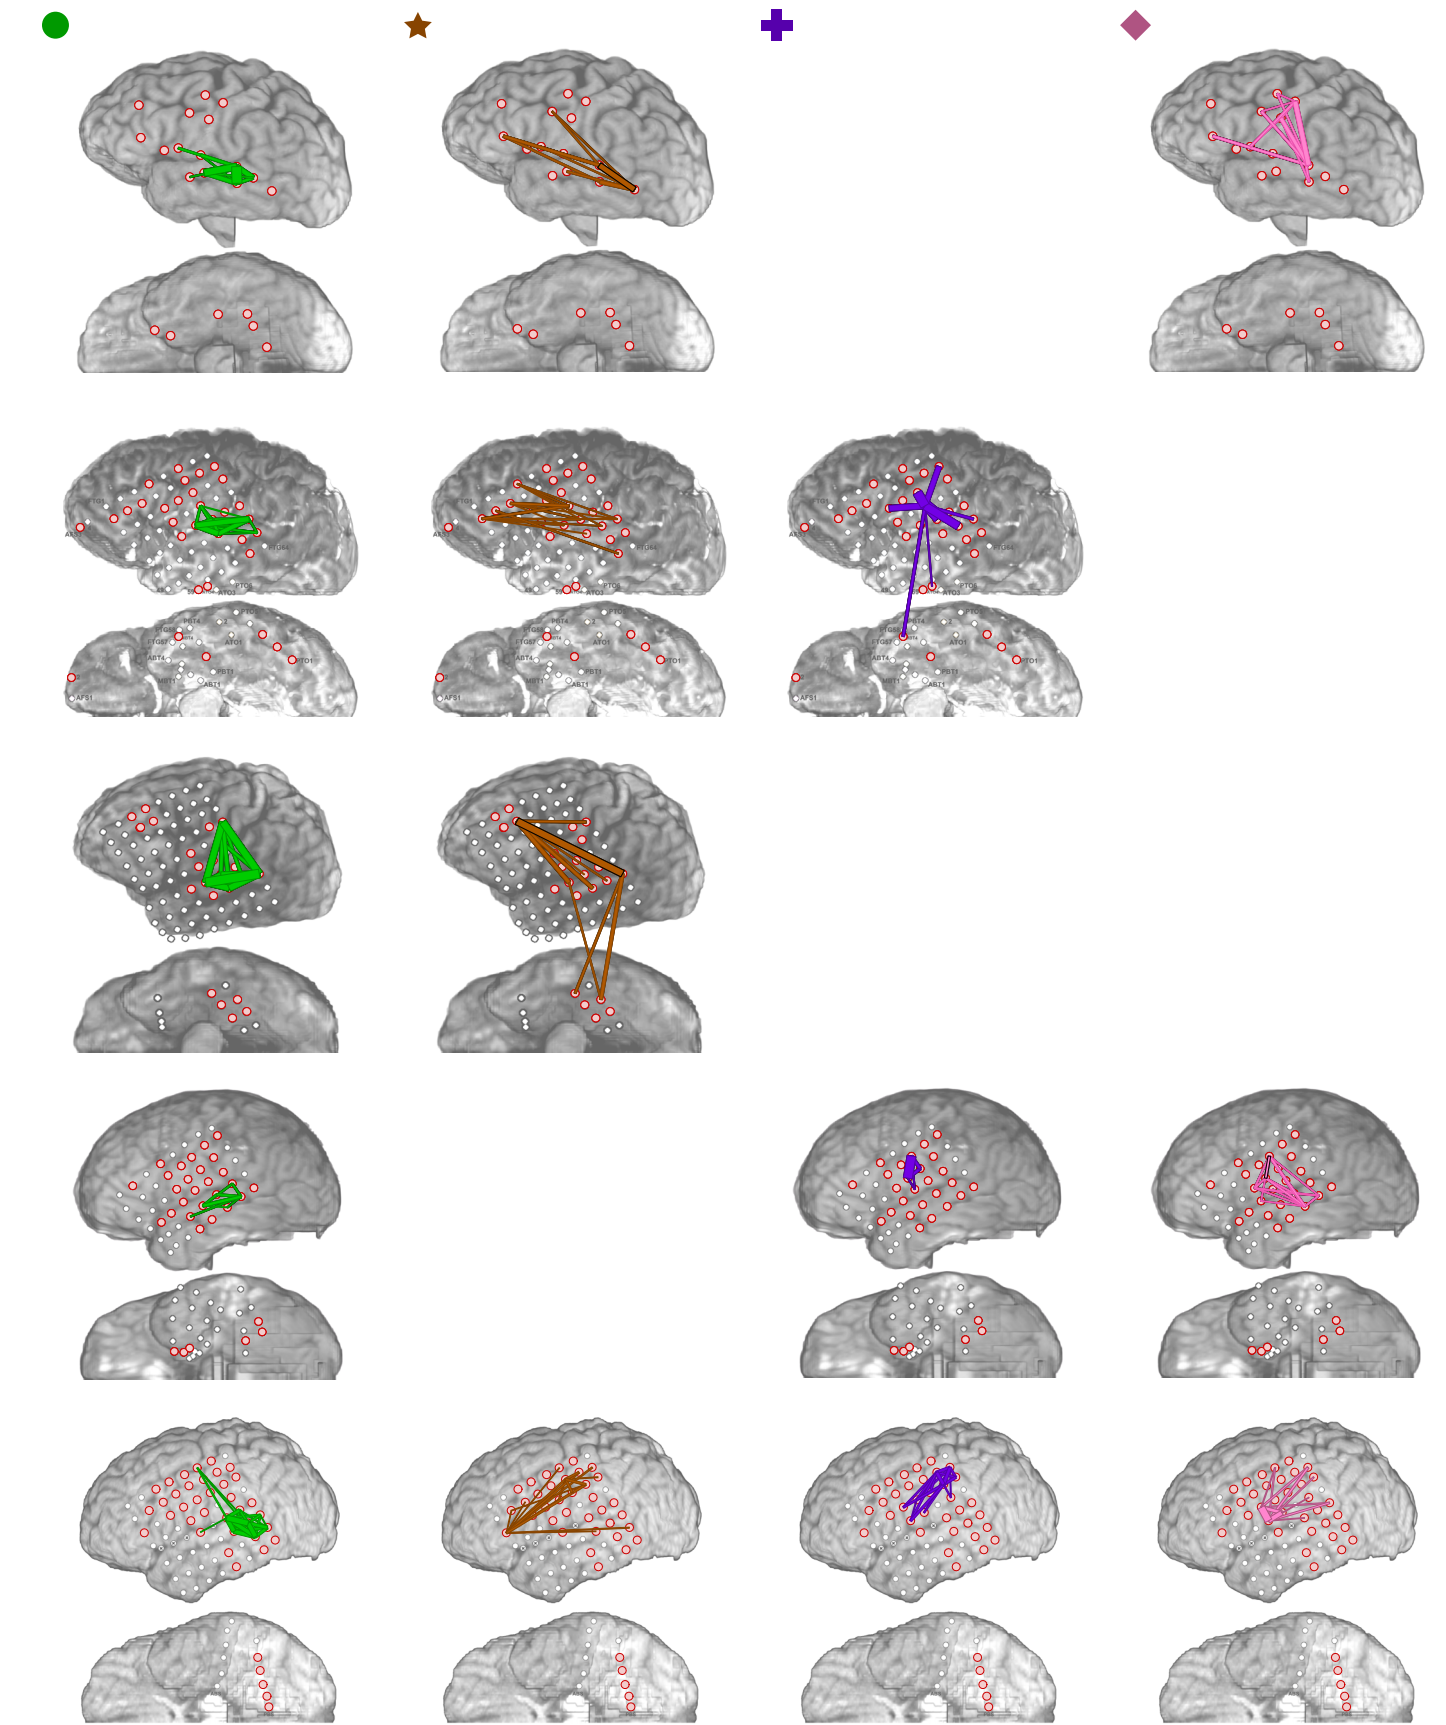

Supplement: NIHMS785704-supplement-2.pdf [file NIHMS785704-supplement-2.pdf]

# Picture Naming Task / FNCs

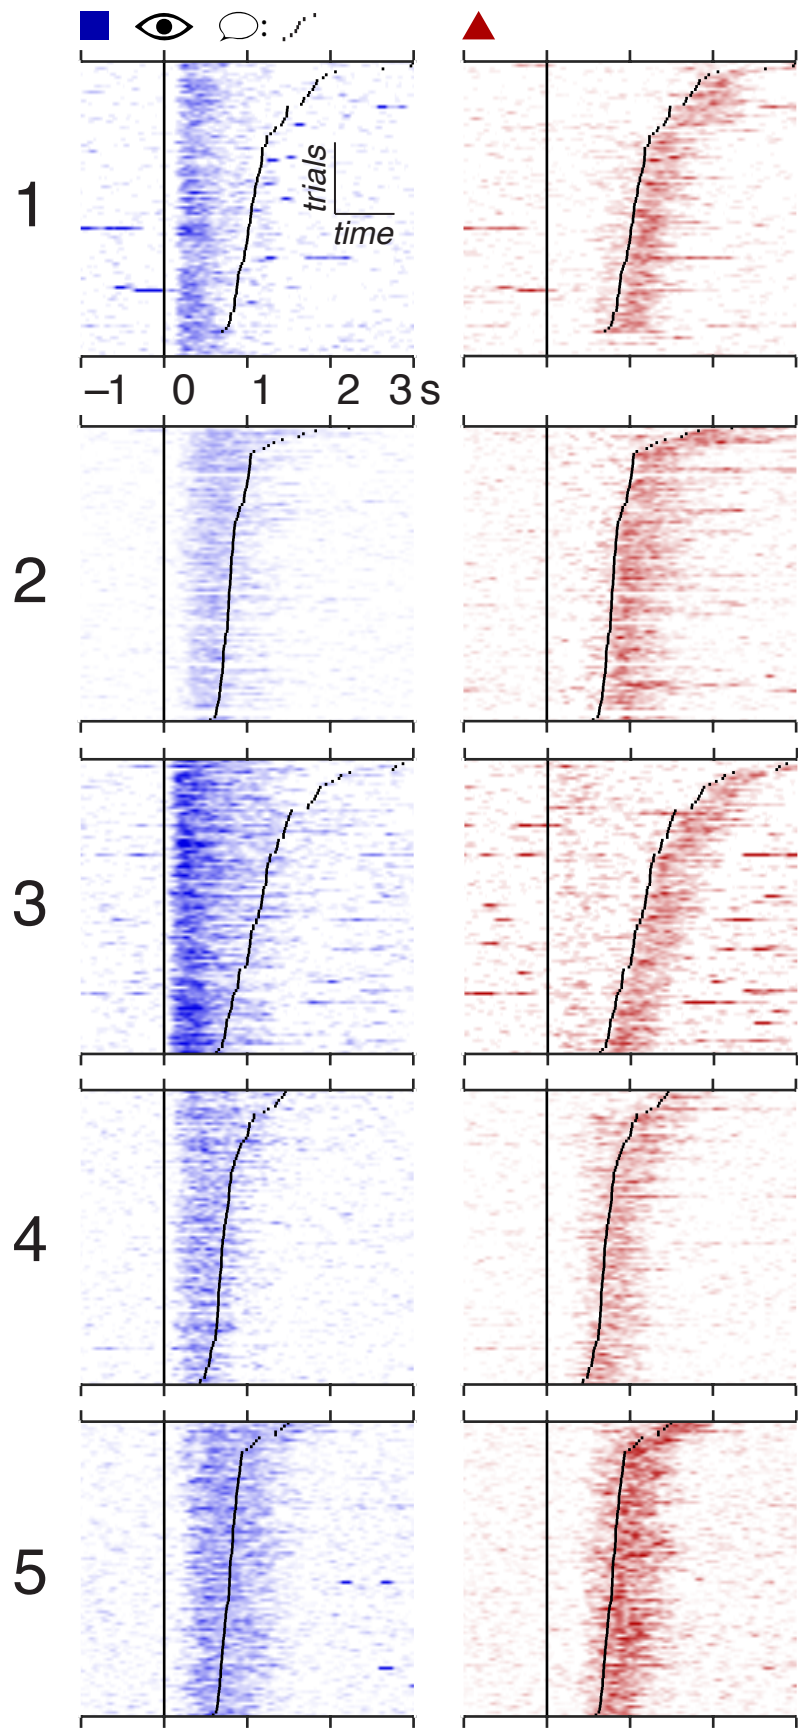

# Auditory Word Repetition Task / FNCs

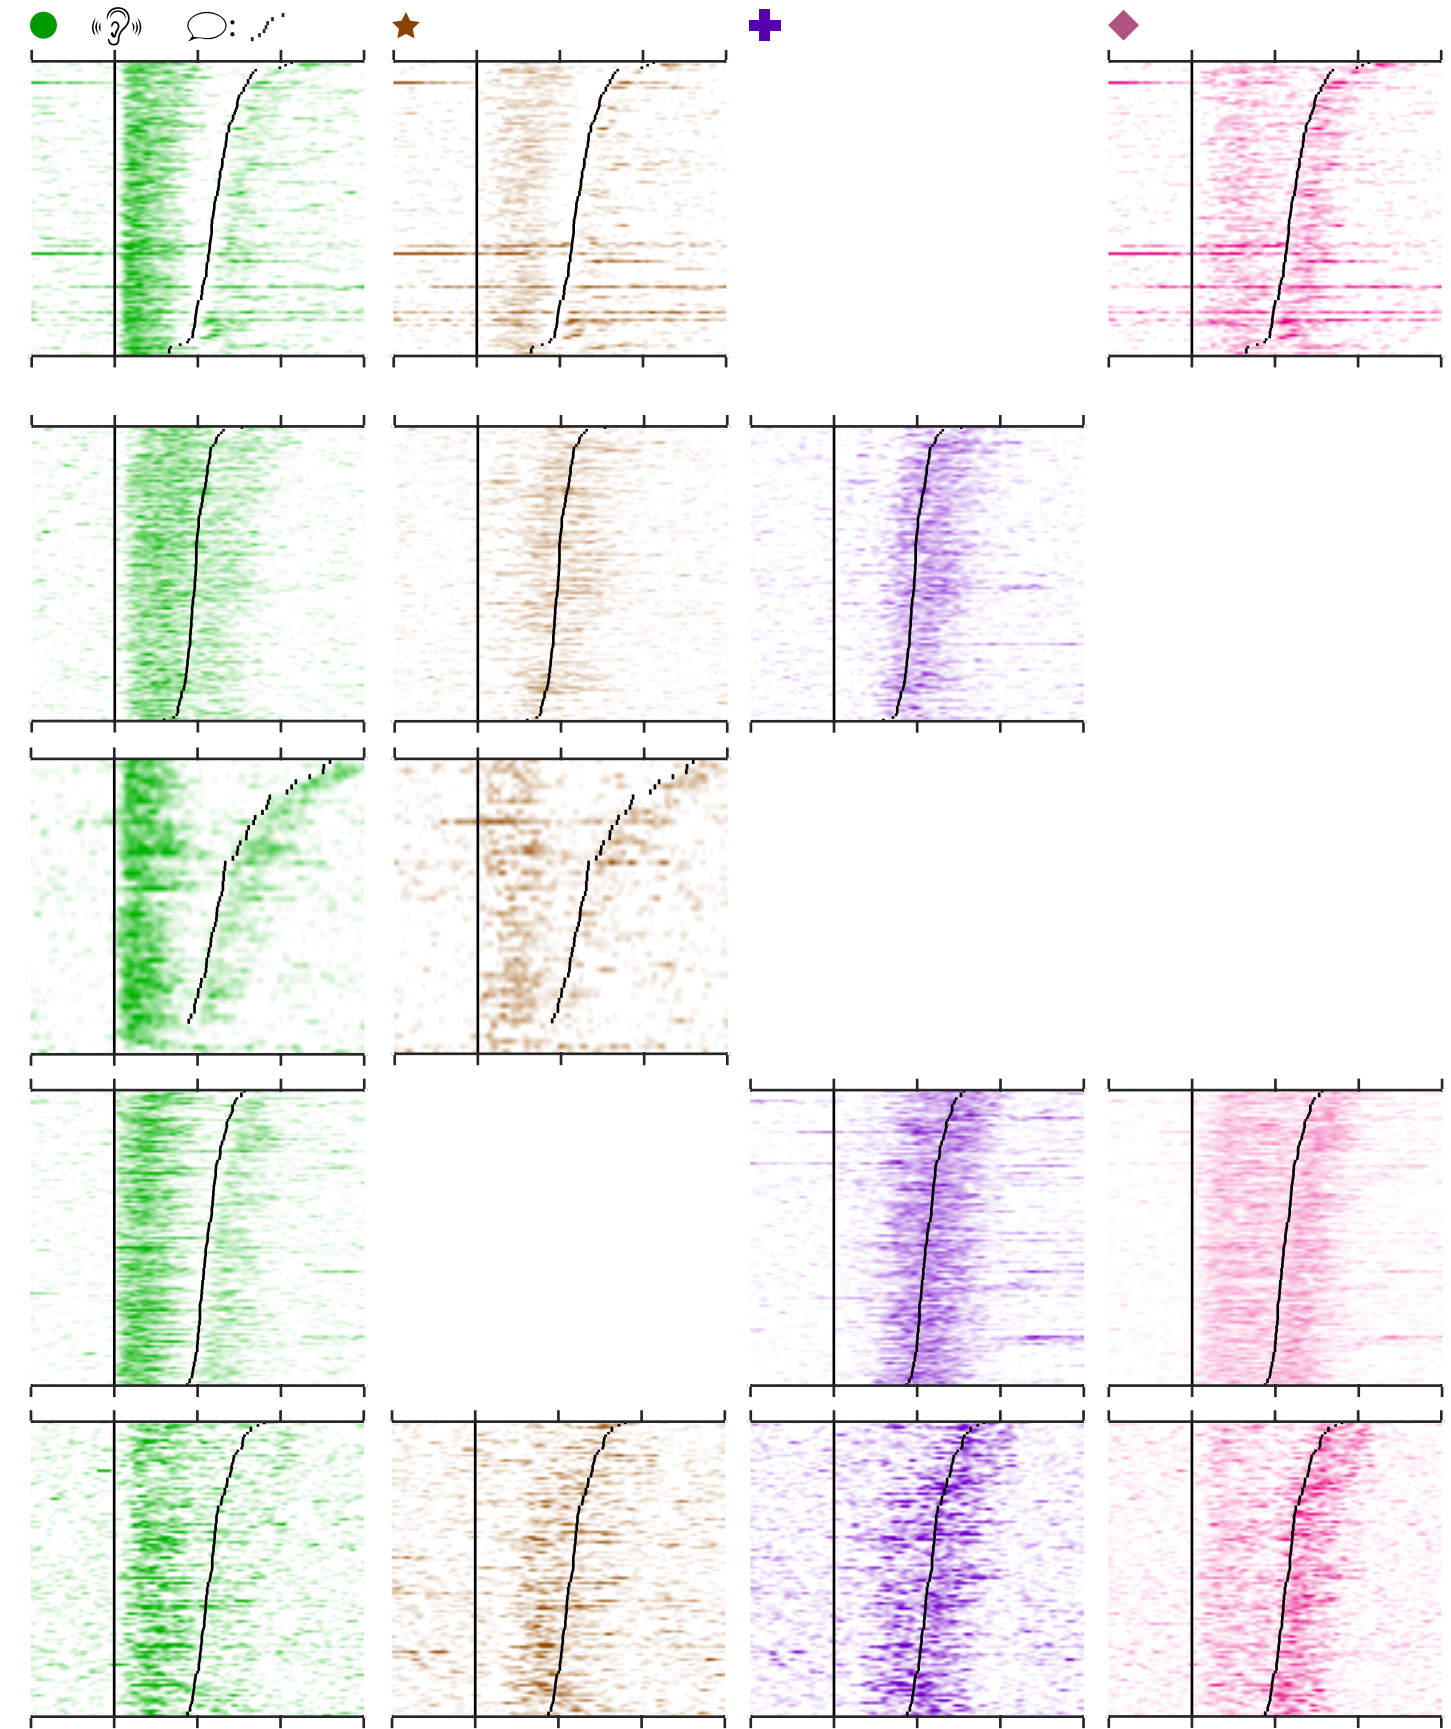

Supplement: NIHMS785704-supplement-3.pdf [file NIHMS785704-supplement-3.pdf]
